# Supplementary material for: Sustainable fertiliser mesh, ‘4D’-precision engineered by flow chemistry: minimising agrochemical pollution
Source: Royal Society of Chemistry journal article supplement (doi:10.1039/d4gc04833d), 2024-12-07

Supporting material for

## **Sustainable Fertiliser Mesh, '4D'-Precision Engineered by Flow Chemistry: Minimising Agrochemical Pollution**

Tu Nguyen Quang Le<sup>a,b</sup>, Chang Nong Lim<sup>c</sup>, Ian Fisk<sup>b,e</sup>, Nam Nghiep Tran<sup>a,e</sup>, Volker Hessel<sup>\*a,f</sup>, Karen Robertson<sup>\*c,g</sup>

<sup>a</sup> School of Chemical Engineering, Faculty of Sciences, Engineering and Technology, The University of Adelaide, Adelaide SA 5005, Australia.

<sup>b</sup> International Flavour Research Centre, Division of Food, Nutrition and Dietetics, University of Nottingham, Sutton Bonington Campus, Loughborough LE12 5RD, United Kingdom.

<sup>c</sup> Department of Chemical and Environmental Engineering, Faculty of Engineering, University of Nottingham, University Park Campus, Nottingham NG7 2RD, United Kingdom.

<sup>d</sup> International Flavour Research Centre (Adelaide), School of Agriculture, Food and Wine and Waite Research Institute, The University of Adelaide, PMB 1, Glen Osmond, South Australia 5064, Australia.

<sup>e</sup> School of Chemical Engineering, Can Tho University, Vietnam.

<sup>f</sup> School of Engineering, University of Warwick, Library Rd, Coventry, United Kingdom.

<sup>g</sup> Advanced Material Research Group, Faculty of Engineering, University of Nottingham, University Park Campus, Nottingham NG7 2RD, United Kingdom.

\*Corresponding authors: [karen.robertson@nottingham.ac.uk](mailto:karen.robertson@nottingham.ac.uk); [volker.hessel@adelaide.edu.au](mailto:volker.hessel@adelaide.edu.au)

Pages: 7; Tables: 3, Figures: 6

Table S1. Summary of soil properties

Table S2. Kinetic of cross-linking of chitosan and citrate ion

Table S3. Value of  $r_0$ ,  $D_r$  and  $t_{0.8}$  of different samples obtained from the logistic growth model with a damping coefficient for the releasing behaviour of both composites in aqueous media

Figure S1. Schematic illustration of chitosan cross-linked citrate ion

Figure S2. SEM images of apatite nanoparticles

Figure S3. Optical microscopy image of passive merging channel

Figure S4. Viscosity titration of citrate ion 0.15 M in 15 mL of Chitosan 1% (w/v). Measurement performed at 24.1°C at 1000 s<sup>-1</sup>.

Figure S5. Elemental mapping images of section (inside) of the capsule on the necklace of S7\_5.25\_0.5\_1.25\_CS sample

Figure S6. SEM-EDS results for fertiliser with different initial conditions

Table S1. Summary of soil properties

| Analysis          | Result | Guideline | Interpretation | Comments                                                                                                                                                                                                           |
|-------------------|--------|-----------|----------------|--------------------------------------------------------------------------------------------------------------------------------------------------------------------------------------------------------------------|
| pH                | 8.1    | 6.0       | High           | High. An alkaline environment will reduce the availability of certain nutrients - particularly P, K, B, Co, Cu, Fe, Mn and Zn. An elevated pH will also impact on beneficial soil fungal populations and activity. |
| Phosphorus (ppm)  | 21     | 16        | Normal         | (Index 2.5) 20 kg/ha P <sub>2</sub> O <sub>5</sub> (16 units/acre).                                                                                                                                                |
| Potassium (ppm)   | 131    | 121       | Normal         | (Index 2.1) Adequate level for grazing system.                                                                                                                                                                     |
| Magnesium (ppm)   | 89     | 51        | Normal         | (Index 2.8) PRIORITY FOR LIVESTOCK HEALTH. Apply 25 kg/ha MgO (20 units/acre) every three to four years. Further applications may be required if there is a history of hypomagnesaemia.                            |
| Calcium (ppm)     | 2244   | 2000      | Normal         | Adequate level.                                                                                                                                                                                                    |
| Sulphur (ppm)     | 18     | 10        | Normal         | Adequate level.                                                                                                                                                                                                    |
| Manganese (ppm)   | 46     | 110       | Very Low       | Consider treatment for optimum grass growth.                                                                                                                                                                       |
| Copper (ppm)      | 4.5    | 8.0       | Low            | PRIORITY FOR LIVESTOCK HEALTH.                                                                                                                                                                                     |
| Boron (ppm)       | 1.25   | 0.50      | Normal         | Adequate level.                                                                                                                                                                                                    |
| Zinc (ppm)        | 5.3    | 7.0       | Slightly Low   | PRIORITY FOR LIVESTOCK HEALTH.                                                                                                                                                                                     |
| Molybdenum (ppm)  | 0.05   | <0.5      | Normal         | No problems anticipated.                                                                                                                                                                                           |
| Iron (ppm)        | 614    | 50        | Normal         | Adequate level.                                                                                                                                                                                                    |
| Sodium (ppm)      | 19     | 90        | Very Low       | PRIORITY FOR LIVESTOCK HEALTH.                                                                                                                                                                                     |
| C.E.C. (meq/100g) | 12.3   | 15.0      | Slightly Low   | Cation Exchange Capacity indicates a slightly low nutrient holding ability - soil applied nutrients could be readily leached. Where possible foliar applied nutrients should be recommended.                       |

Table S2. Kinetic of cross-linking of chitosan and citrate ion

$$-r = k [\text{Chitosan}]^x [\text{Citrate}]^y [\text{Acetic}]^z \Rightarrow \begin{cases} k = 9.92 \times 10^{-4} \\ x = -2.1 \\ y = 2.35 \\ z = 0 \end{cases}$$

$$k = A \times e^{\frac{-E_a}{RT}} \Rightarrow \begin{cases} A = 5.43 \times 10^7 \\ E_a = 61.08 \text{ KJ.mol}^{-1} \end{cases}$$

| Temp. Concentrations |           |                |                 |                                           | Equilibrium time |
|----------------------|-----------|----------------|-----------------|-------------------------------------------|------------------|
| °C                   | Citrate M | Chitosan (w/v) | % Acetic acid M | Fitting                                   | s                |
| 24.1                 | 0.15      | 1              | 0.1             | $y = 9.36681 + 50.50092.e^{-x/28.15465}$  | 255              |
| 24.1                 | 0.075     | 1              | 0.1             | $y = 14.08345 + 33.18494.e^{-x/96.30774}$ | 781.5            |
| 24.1                 | 0.075     | 0.5            | 0.05            | $y = 5.61841 + 18.3832.e^{-x/17.05091}$   | 132              |
| 24.1                 | 0.075     | 0.5            | 0.1             | $y = 9.31094 + 12.36181.e^{-x/16.96054}$  | 127.5            |
| 18.1                 | 0.15      | 1              | 0.1             | $y = 9.36778 + 54.06066.e^{-x/46.29918}$  | 424.5            |

The modified equation for the releasing behaviour model has been adapted for this study and is as follows:

$$H = 1 - e^{-\frac{r_0}{C_{inf}} \times t^{1-D_r}}$$

Where,  $H$  : releasing efficiency  
 $r_0$  : initial releasing rate (mg mL<sup>-1</sup> min<sup>-1</sup>)  
 $C_{inf}$  : equilibrium concentration (mg mL<sup>-1</sup>)  
 $D_r$  : damping coefficient

Table S3. Value of  $r_0$ ,  $D_r$  and  $t_{0.8}$  of different samples obtained from the logistic growth model with a damping coefficient for the releasing behaviour of both composites in aqueous media.

| Sample          | Aqueous media   | $r_0$<br>(mg L <sup>-1</sup> min <sup>-1</sup> ) | $D_r$   | $R^2$  | $t_{0.8}$ |
|-----------------|-----------------|--------------------------------------------------|---------|--------|-----------|
| CFI-made-CAC    | Deionised water | 0.0048                                           | 0.85325 | 0.9403 | 69 days   |
|                 | Acetate buffer  | 84.4152                                          | 0.81139 | 0.9541 | 9.4 mins  |
| sheath-made-CAC | Deionised water | 0.0012                                           | 0.74135 | 0.9669 | 2422 days |
|                 | Acetate buffer  | 20.1872                                          | 0.83865 | 0.9779 | 62 days   |

Figure S1. Schematic illustration of chitosan cross-linked citrate ion

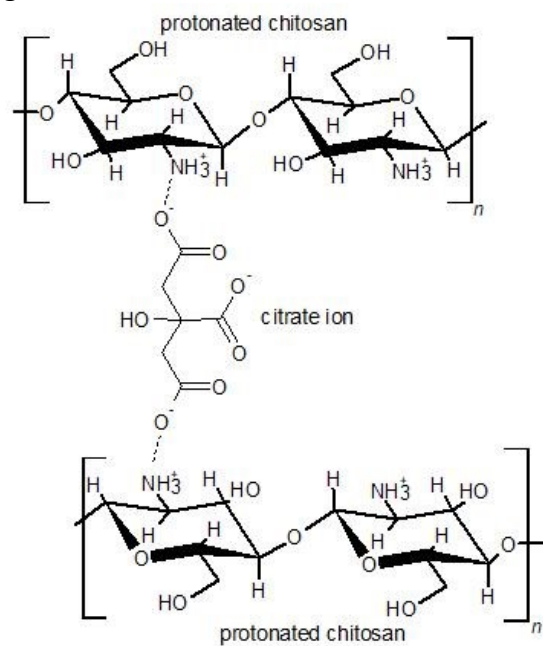

Figure S2. SEM images of apatite nanoparticles

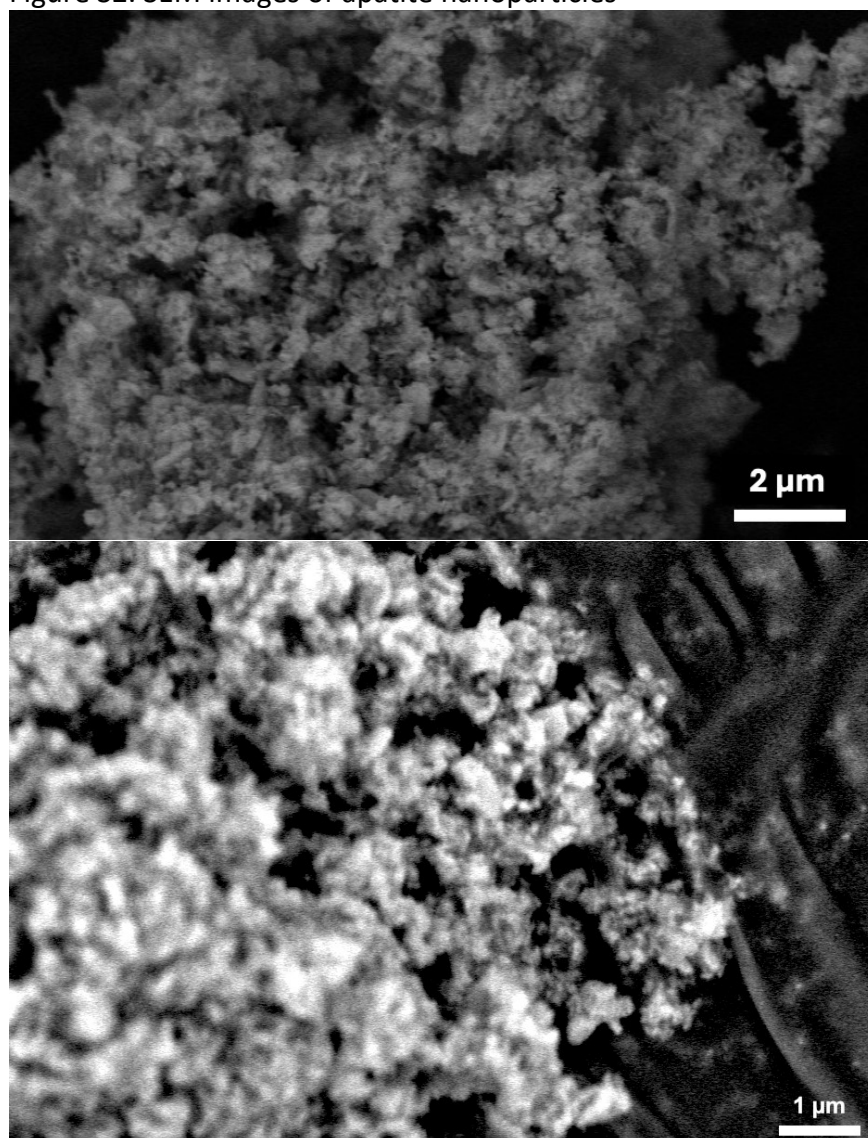

Figure S3. Optical microscopy image of passive merging channel

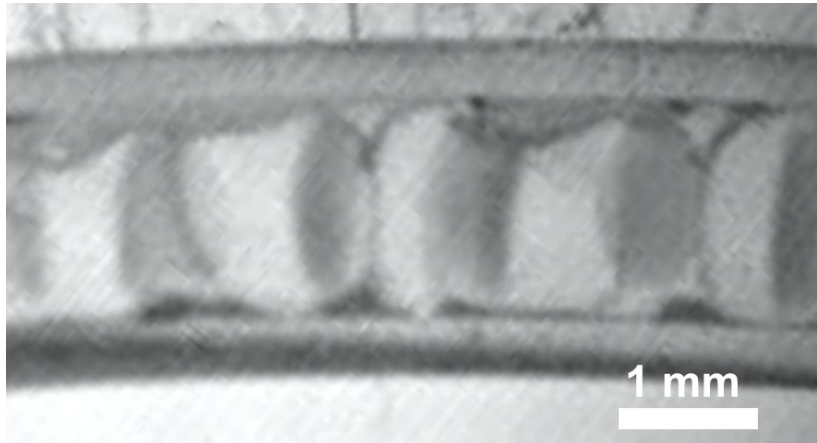

Figure S4. Viscosity titration of citrate ion 0.15 M in 15 mL of Chitosan 1% (w/v). Measurement performed at 24.1°C at 1000 s<sup>-1</sup>.

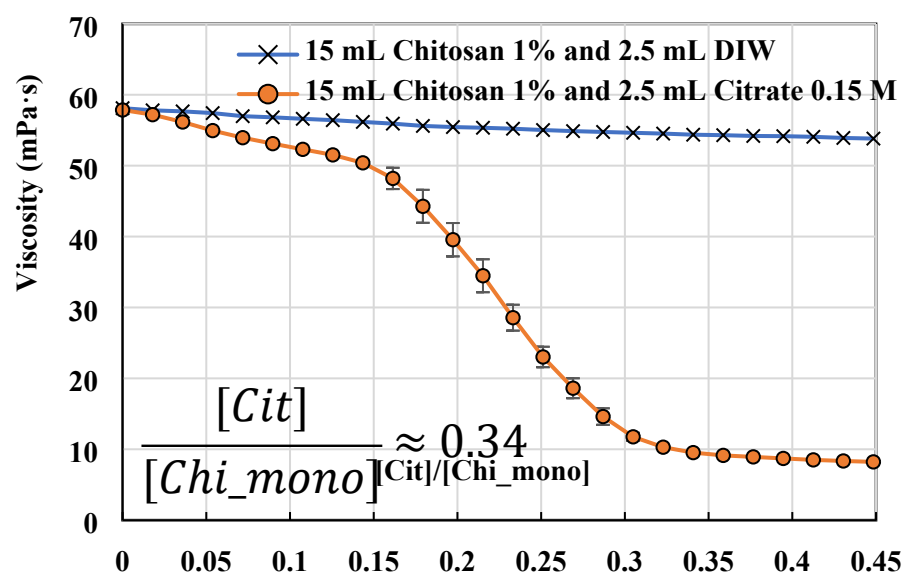



Figure S5. SEM-EDS results for fertiliser with different initial conditions

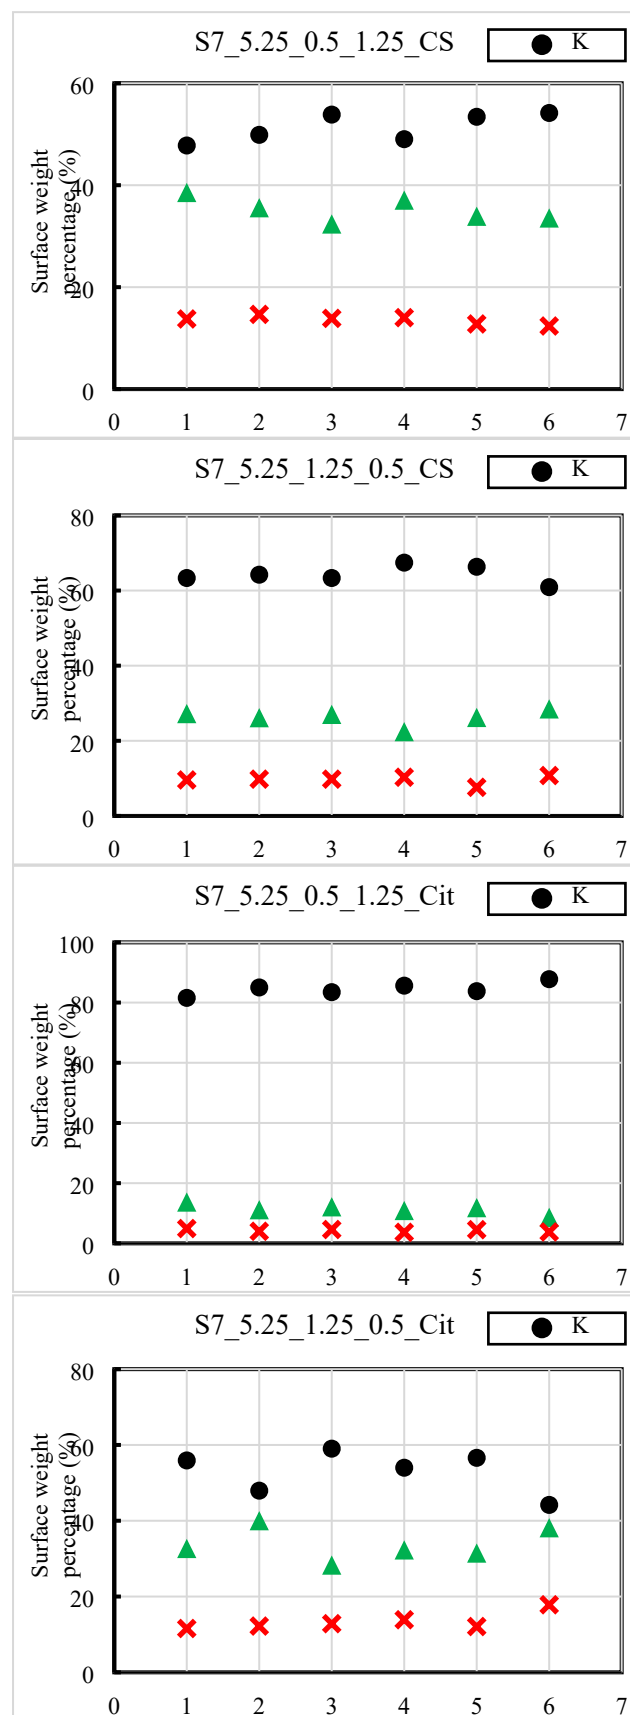

Figure S6. Elemental mapping images of section (inside) of the capsule on the necklace of S7\_5.25\_0.5\_1.25\_CS sample

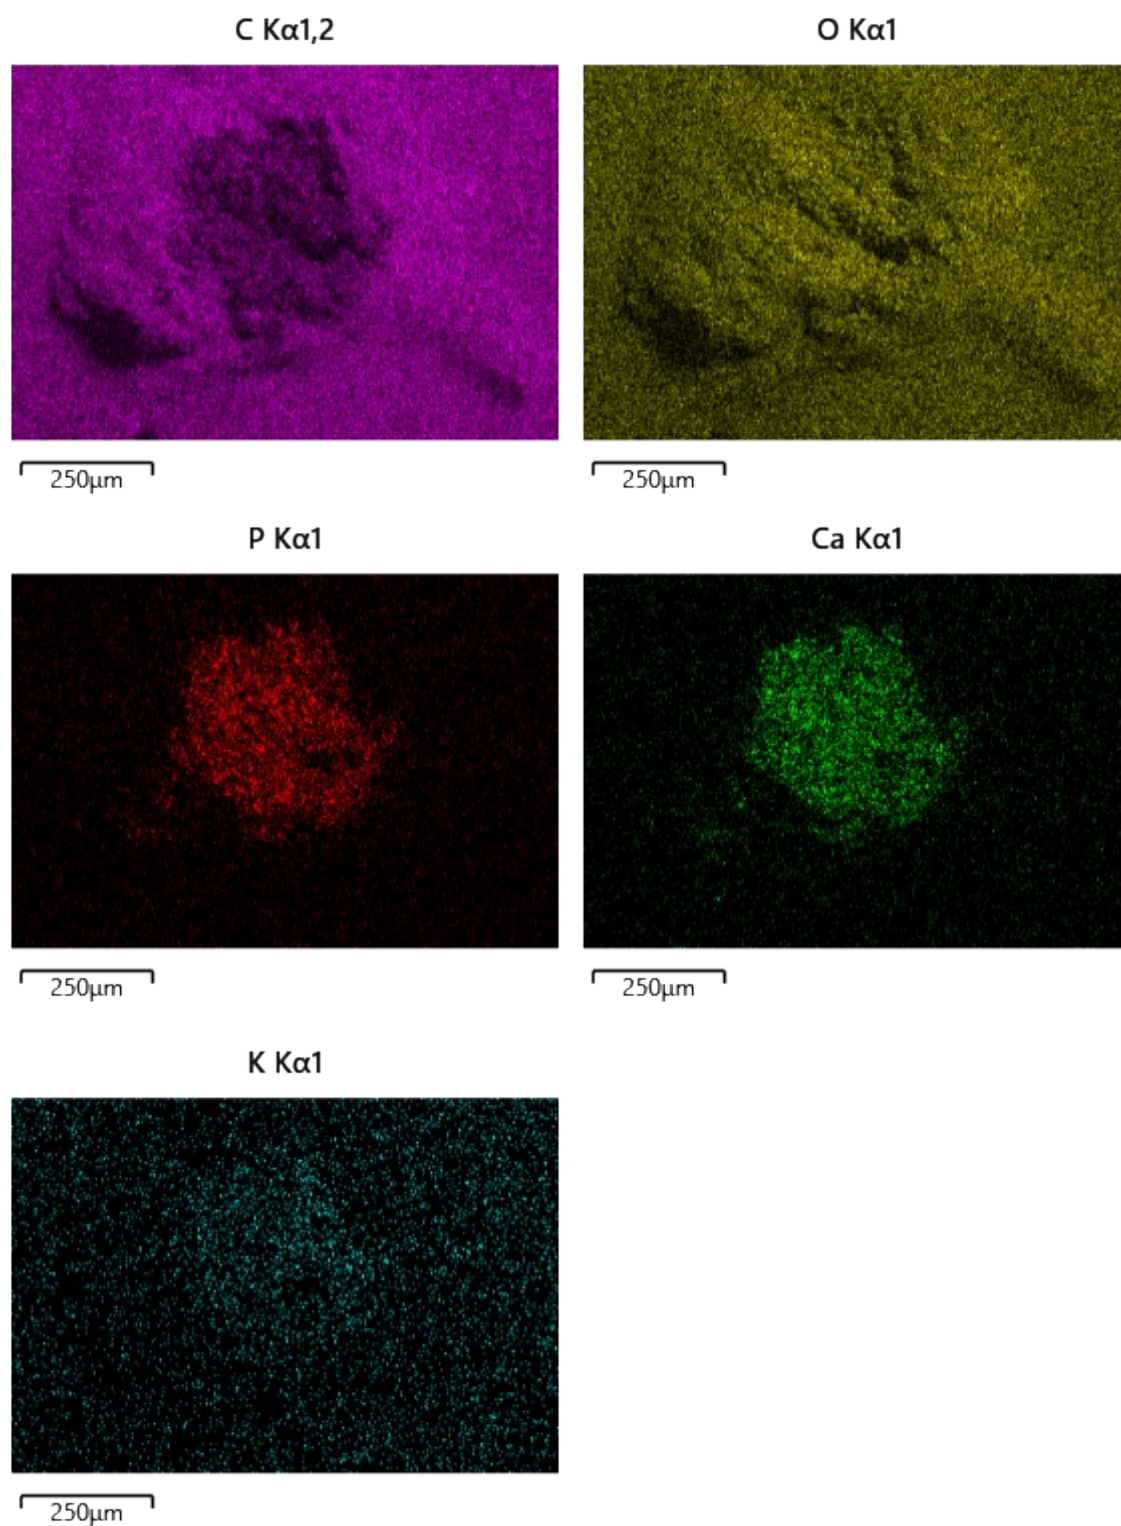

Supplement: d4gc04833d1.pdf [file d4gc04833d1.pdf]
